# Supplementary material
Source: publisher figshare collection journal article supplement (https://acs.figshare.com/ndownloader/files/31608717)
Supplement: Supplementary file 1 [file 31608717]

Compound_ID	SMILES
HS-tLL	O[C@@H]1C[C@@H]([C@](N[C@@H](CO)C(O)=O)=O)NC1
HS-tLD	O[C@@H]1C[C@@H]([C@](N[C@H](CO)C(O)=O)=O)NC1
HS-tDL	O[C@H]1C[C@H]([C@](N[C@@H](CO)C(O)=O)=O)NC1
HS-tDD	O[C@H]1C[C@H]([C@](N[C@H](CO)C(O)=O)=O)NC1
HS-cLL	O[C@H]1C[C@@H]([C@](N[C@@H](CO)C(O)=O)=O)NC1
HS-cLD	O[C@H]1C[C@@H]([C@](N[C@H](CO)C(O)=O)=O)NC1
HS-cDL	O[C@@H]1C[C@H]([C@](N[C@@H](CO)C(O)=O)=O)NC1
HS-cDD	O[C@@H]1C[C@H]([C@](N[C@H](CO)C(O)=O)=O)NC1
cyclo(L-Hyp-L-Ser)	O=C([C@H](CO)N1)N2[C@](C[C@@H](O)C2)([H])C1=O
Gly-Sar	NCC(N(C)CC(O)=O)=O
